# Supplementary material
Source: PubMed Central journal article supplement (PMC2533186)
Supplement: 0708850105_0708850105SI.pdf [file 0708850105_0708850105SI.pdf]

# Supporting Information

Liu et al. 10.1073/pnas.0708850105

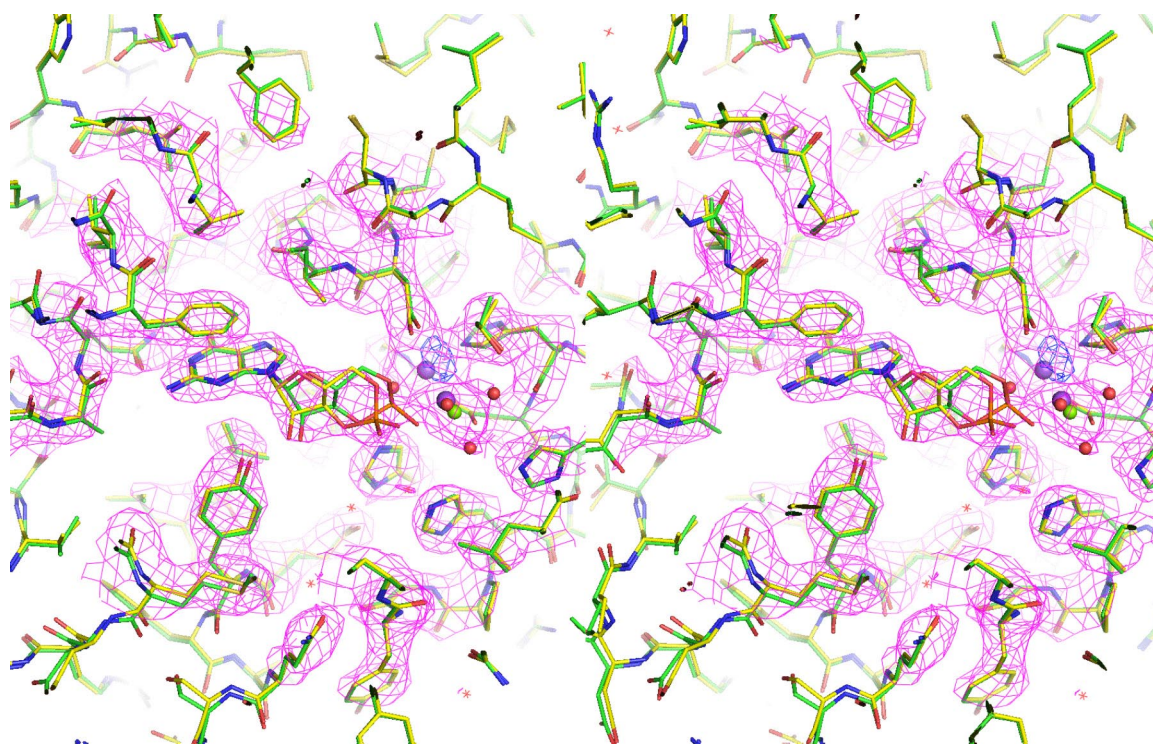

**Fig. S1.** Crystalline PDE9 was unable to completely hydrolyze cGMP in the absence of divalent cations in 2 days (1mM cGMP). The strong positive  $F_{o,original} - F_{o,cGMP+no\ ion}$  electron density (blue,  $10\ \sigma$ ) indicates significant exchange of the original divalent cations (green) by  $Na^+$  (blue purple). The final refined  $E_{Na,NaS}$  complex model (yellow carbons) are embedded in the initial  $2Fo-Fc$  maps calculated before ligands and water molecules were built (pink,  $1.2\ \sigma$ ), and was superimposed with the *ES* complex model discussed in Fig. 1C (green carbons).

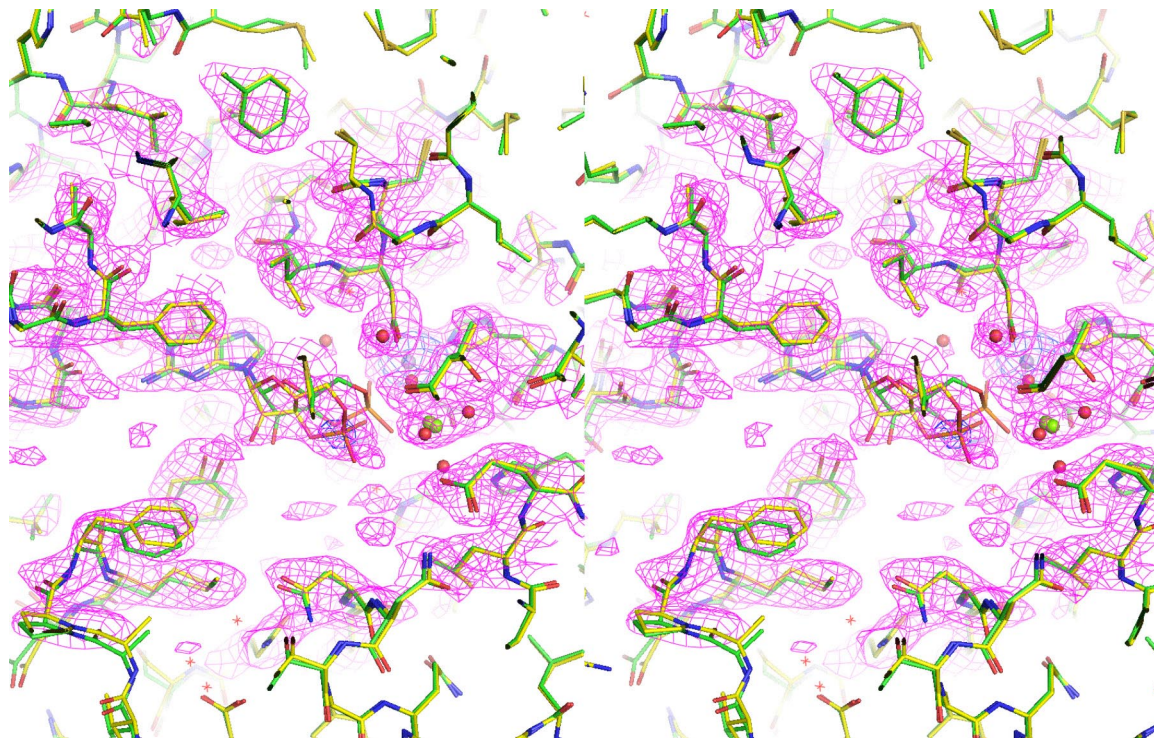

**Fig. S2.** Crystalline PDE9 was unable to completely hydrolyze cGMP in the presence of  $\text{Zn}^{2+}$  in 2 days (1mM cGMP + 2mM  $\text{ZnCl}_2$ ). The strong positive  $F_o - F_c$  electron density (blue,  $10 \sigma$ ) indicates the full occupancies of  $\text{Zn}^{2+}$ , as well as the precise location of the phosphorus. The final refined  $E_{\text{Zn,ZnS}}$  complex model (yellow carbons) are embedded in the initial  $2F_o - F_c$  map calculated before ligands and water molecules were built (pink,  $1.2 \sigma$ ), and was superimposed with the ES complex model discussed in Fig. 1C (green carbons).

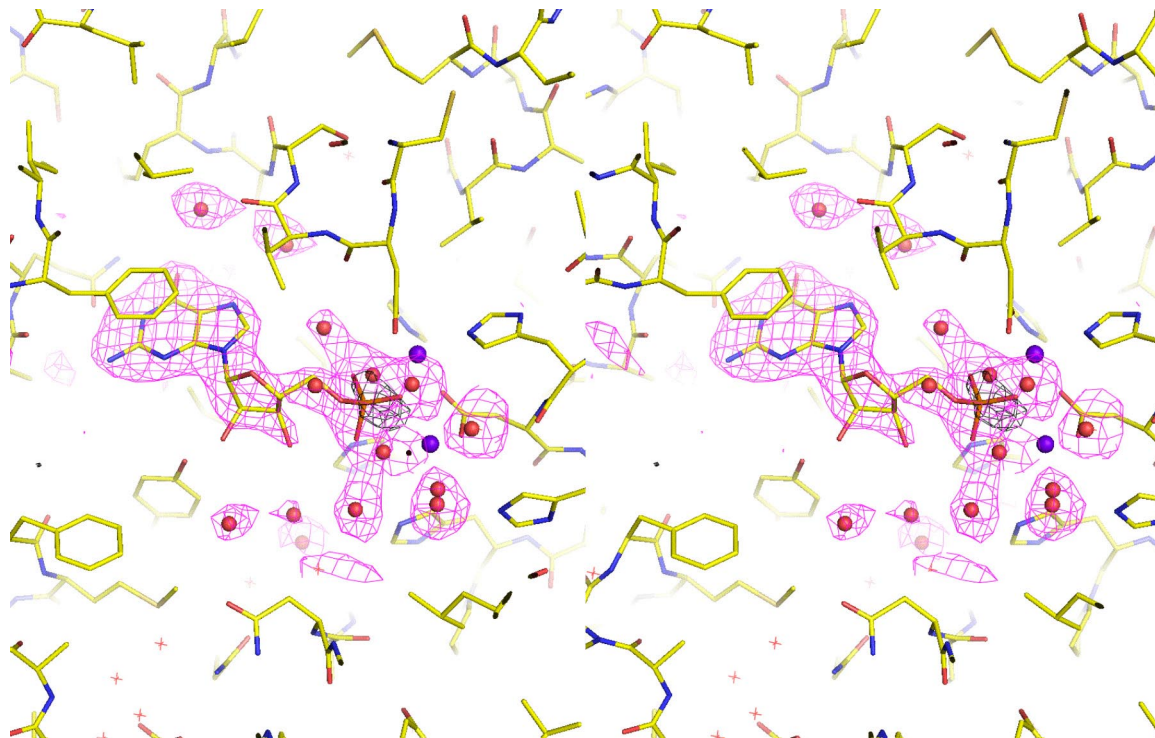

**Fig. S3.** The final refined model of *E+P* complex (sticks model, yellow carbon) embedded in the initial Fo-Fc electron density ( $2\sigma$ ) before ligand and waters were included. The ribose and phosphates in the *E+P* complexes, if kept full occupancies during refinements, would have average B factors 40% higher than those of the bases, and would result in strong negative Fo-Fc electron densities around the phosphate ( $-4\sigma$ , black). In the final *E+P* model, the hydrolysis center in the *E+P* complex was modeled 50% occupied by the partially ordered ribose and phosphate and 50% unliganded. With this model, no strong difference electron densities were observed.

**Table S1. Ligands used in soaking, X-ray data collection, and refinement statistics**

|                           | Complex                   |                                          |                           |                            |                             |                             |                            |
|---------------------------|---------------------------|------------------------------------------|---------------------------|----------------------------|-----------------------------|-----------------------------|----------------------------|
|                           | <i>ES</i>                 | <i>EP</i>                                | <i>E<sub>Na,NaS</sub></i> | <i>E<sub>Zn,ZnS</sub></i>  | <i>E+P</i>                  | <i>E+P</i>                  | <i>E+P</i>                 |
| Ligand                    | 20 mM<br>cGMP             | 20 mM<br>cGMP                            | 1 mM<br>cGMP              | 1 mM cGMP                  | 1 mM<br>cGMP                | 1 mM<br>cGMP                | 20 mM<br>GMP               |
| Divalent metal ion        | 2 mM<br>MnCl <sub>2</sub> | MnCl <sub>2</sub> +<br>MgCl <sub>2</sub> | None                      | 0.2–2 mM ZnCl <sub>2</sub> | 200 μM<br>MgCl <sub>2</sub> | 500 μM<br>MnCl <sub>2</sub> | 20 mM<br>MgCl <sub>2</sub> |
| Soaking time              | 1 min                     | Brief (2<br>h)                           | 2 days                    | 2 days                     | 2 days                      | 2 days                      | 2 days                     |
| Resolution (Å)            | 2.7                       | 2.3                                      | 2.3                       | 2.3                        | 2.4                         | 2.15                        | 2.4                        |
| R merge (%)               | 9.6 (59)                  | 7.7 (43)                                 | 8.5 (68)                  | 9.0 (54)                   | 10.4 (59)                   | 5.8 (46)                    | 10.4 (36)                  |
| <i>I</i> / $\sigma$       | 15 (2.0)                  | 18.9 (3.7)                               | 23 (2.5)                  | 19 (2.7)                   | 28 (3.0)                    | 29 (3.3)                    | 19 (2.2)                   |
| Completeness (%)          | 99.9(100)                 | 99.4(100)                                | 98.7(94.7)                | 99.8(100)                  | 99.8(100)                   | 96.8(97.2)                  | 91(55)                     |
| Redundancy                | 6.2 (6.3)                 | 4.0 (4.0)                                | 7.0 (6.5)                 | 6.1 (6.1)                  | 6.9 (5.5)                   | 4.6 (4.6)                   | 7.9 (5.1)                  |
| R factor (%)              | 19.1 (32)                 | 18.8 (23)                                | 18.5 (28)                 | 18.1 (28)                  | 18.4 (30)                   | 17.5 (23)                   | 17.3 (28)                  |
| R free (%)                | 22.0 (33)                 | 21.2 (28)                                | 20.5 (34)                 | 20.5 (30)                  | 21.1 (30)                   | 19.8 (25)                   | 22 (35)                    |
| Bond length deviation (Å) | 0.023                     | 0.012                                    | 0.013                     | 0.013                      | 0.017                       | 0.016                       | 0.022                      |
| Bond angle deviation (°)  | 1.9                       | 1.2                                      | 1.3                       | 1.2                        | 1.4                         | 1.4                         | 2.0                        |
| Ligand in monomer A       | cGMP                      | GMP                                      | cGMP                      | cGMP                       | GMP                         | GMP                         | GMP                        |
| Ligand in monomer B       | IBMX                      | IBMX                                     | IBMX                      | IBMX/ nucleotides          | IBMX                        | IBMX                        | IBMX/GMP                   |

The *EP* complex experiments were repeated with 20 mM cGMP + 20 mM MnCl<sub>2</sub> + 20 mM MgCl<sub>2</sub> for a few seconds, 1 min, 1 h, or 2 h or with 2 mM cGMP + 2 mM MnCl<sub>2</sub> for 2 min. The *E<sub>Zn,ZnS</sub>* complex experiment was done with 0.2 or 2 mM ZnCl<sub>2</sub>. The *E+P* complex experiments with MgCl<sub>2</sub> or MnCl<sub>2</sub> were repeated twice. Only the highest resolution statistics of the same experiments are included in the table.

## Other Supporting Information Files SI Appendix

[SI Appendix](#)
